# Supplementary material for: The Therapeutic Effects of Nigella sativa on Skin Disease: A Systematic Review and Meta-Analysis of Randomized Controlled Trials
Source: Evid Based Complement Alternat Med. 2022 Dec 5;2022:7993579. doi: 10.1155/2022/7993579 (PMC9744621; doi:10.1155/2022/7993579)
Supplement: Supplementary Materials — Supplementary file S2: critical appraisal for quasi-experimental studies included in the review. [file 7993579.f1.zip]

Archive with 2 entries (2 files):
- Supplementary File S1.docx
- Supplementary File.docx
